# Supplementary material for: Extensively Drug-Resistant Hypervirulent Klebsiella pneumoniae From a Series of Neonatal Sepsis in a Tertiary Care Hospital, India
Source: Front Med (Lausanne). 2021 Mar 8;8:645955. doi: 10.3389/fmed.2021.645955 (PMC7982647; doi:10.3389/fmed.2021.645955)
Supplement: Supplementary file 1 [file Table_1.DOCX]

| **Multiplex PCR** | **Genes** | **Primer sequence** | **Reaction condition** | **Amplified product size (bp)** |
| --- | --- | --- | --- | --- |
| 1st multiplex PCR | iroN-Forward | TTCCTTTCAGGTAGCAGCCG | 95°C-2mins  95°C-20secs  52°C-30secs 35 cycles  72°C-1mins  72°C-5mins | 669bp |
| iroN-Reverse | ACCTAGCGAAATCCCGCAAA |
| iutA-Forward | TTATTCGCCACCACGCTCTT | 890bp |
| iutA-Reverse | AGCACGCCATTCGTCAGTAA |
| iucB-Forward | AGCTAAACGGCCTATCGTCG | 368bp |
| iucB-Reverse | AAGCGACATCATCCATCGCA |
| iucC-Forward | CAGTCGTTATCCAGCCCGTT | 221bp |
| iucC-Reverse | AATAAAGGTCGTCGGGGCTG |
| iucD-Forward | GGCGGCATACTGAGATCGAA | 751bp |
| iucD-Reverse | GCTTCCACGCCAGTGAAATG |
| 2nd multiplex PCR | rmpA-Forward | CAATGGATGTGGCTTGACGTTT | 95°C-2mins  95°C-20secs  50°C-40secs 35 cycles  72°C-1:20mins  72°C-7mins | 196bp |
| rmpA-Reverse | ATTGCAGCACTGCTTGTTCCT |
| rmpA2-Forward | TGAAGGCTCGATGGATAAACC | 350bp |
| rmpA2-Reverse | CCCTCCTGGAGAGTAAGCATT |
| iroB-Forward | GGTTTTTCGCCACTTCGCTT | 562bp |
| iroB-Reverse | AACGACGGCGAACCCATTAT |
| iroC-Forward | CGGGAAATAGACGGCAAGGT | 978bp |
| iroC-Reverse | AGCCGAATTGTGATGCTGGA |
| iroD-Forward | AACCAAGCCCGTCAATCAGT | 633bp |
| iroD-Reverse | ACGTTGATGTTTTGCAGCCC |
| 3rd multiplex | iucA-Forward | GGTCACGGCAAAAGTGGAGT | 95°C-2mins  95°C-20secs  51°C-40secs 35 cycles  72°C-1:20mins  72°C-7mins | 600bp |
| iucA-Reverse | GAAGTGAAGCGTGGAATGCG |
| entB-Forward | AGTGGTGGCTAATATCGCCG | 522bp |
| entB-Reverse | TCATCGGATTCGTCGAGCAG |
| allS-Forward | AATGGCGAAGGGGGACGC | 807bp |
| allS-Reverse | CGATGCTCGATCCCGAAACAT |
| KfuB-Forward | TTGCCGTTAGGGTTTGTGGT | 426bp |
| KfuB-Reverse | GAAGAACACTTTCCACGGCG |
| KfuC-Forward | TCGAAATCCTTCGCTGATGC | 935bp |
| KfuC-Reverse | CTCACGGTTCGCAGGACAAT |
| 4th multiplex | entF-Forward | TATCGATGGTGTGCAGGCAG | 95°C-2mins  95°C-20secs  50°C-40secs 35 cycles  72°C-1:20mins  72°C-7mins | 835bp |
| entF-Reverse | GTCGTCGGCAGATAACGGAT |
| allB-Forward | CTGATCGTTTCGCCGGGTAT | 528bp |
| allB-Reverse | AATGGCTTCCACTTCGGTGA |
| KfuA-Forward | GAAGTCGTGGGTGGATGGAT | 643bp |
| kfuA-Reverse | ACCGGAAATGCTGACGAAGG |
| ybtA-Forward | CACCGCAAACGCAATCTGAA | 474bp |
| ybtA-Reverse | CCTGAGCCGTTAAGTGGGTT |
| ybtQ-Forward | CATTGATGCGCTGTTACGGG | 256bp |
| ybtQ-Reverse | GAGGTTTTCATCCACGCTGC |
| 5th multiplex | ybtE-Forward | GATAAACGCGCAAATCCGCT | 95°C-2mins  95°C-20secs  50°C-40secs 35 cycles  72°C-1:20mins  72°C-7mins | 954bp |
| ybtE-Reverse | GTGAGCGACGATTTTACGCC |
| ybtT-Forward | GCATCTGGTCATGTGCCCTT | 684bp |
| ybtT-Reverse | TGGCGGACAATCTGCGTAAA |
| ybtU-Forward | GGCGGTGCATGATAAGGCTA | 475bp |
| ybtU-Reverse | GCCTGTATTGTCGTGCGTTC |
| ybtX-Forward | CGAATGTGAAACCGCTGACG | 658bp |
| ybtX-Reverse | TGCCGGGTGAGGTGTATTTC |
| 6th multiplex | ybtP-Forward | GGATACGGCCTGTTGCACTA | 95°C-2mins  95°C-20secs  50°C-40secs 35 cycles  72°C-1:20mins  72°C-7mins | 921bp |
| ybtP-Reverse | TTGCCAGAGCCGTTGATACA |
| ybtS-Forward | GATACCGCCCTCAATGGTGA | 658bp |
| ybtS-Reverse | CATCAAAGCGCGTATCGTCC |
| fyuA-Forward | TACAGTGACCTGACCTGGCA | 242bp |
| fyuA-Reverse | ACGATGTTGTACCCGGAAGG |

**Supplementary Table 1:** Primers used for determination of hypervirulence and their running conditions
